## RESEARCH ARTICLE

# Insilico discovery of novel Phosphodiesterase 4 (PDE4) inhibitors for the treatment of psoriasis: Insights from computer aided drug design approaches

Abdullah R. Alanzi<sup>1\*</sup>, Mohammed S. Alsalhi<sup>2</sup>, Ramzi A. Mothana<sup>1</sup>, Jawaher H. Alqahtani<sup>1</sup>, Moneerah J. Alqahtani<sup>1</sup>

<sup>1</sup> Department of Pharmacognosy, College of Pharmacy, King Saud University, Riyadh, Saudi Arabia,

<sup>2</sup> Department of Pharmaceutical Chemistry, College of Pharmacy, King Saud University, Riyadh, Saudi Arabia

\* [aralonazi@ksu.edu.sa](mailto:aralonazi@ksu.edu.sa)

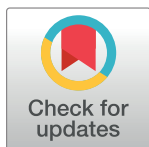

## Abstract

Psoriasis is chronic immune-mediated inflammatory disorder characterized by various comorbidities, erythematous plaques with silvery scale which can lead to psoriatic arthritis. The phosphodiesterase 4 (PDE4) protein is a potential drug target to control Psoriasis. In the current study, pharmacophore-based virtual screening of Diversity library of ChemDiv database was first performed, and then the screened hits were docked to the active site of PDE4 to choose the best binding modes. Forty-six hits generated during the virtual screening were prepared and docked to the PDE4 receptor by SP docking module of glide. The binding affinities of the selected hits were calculated by molecular docking and based on the affinities, ten hits were selected for the bioactivity scores prediction and ADMET analysis. Based on the ADMET profiling, four hits **D356-2630**, **C700-2058**, **G842-0420** and **F403-0203** were processed to MD simulations for stability analysis. The outcomes showed that these compounds showed strong binding with proteins with better binding free energies. Based on the results of our study, we proposed that these hits can function as lead in the biological assays and in vitro studies are required to develop the novel drug candidates.

## OPEN ACCESS

**Citation:** Alanzi AR, Alsalhi MS, Mothana RA, Alqahtani JH, Alqahtani MJ (2024) Insilico discovery of novel Phosphodiesterase 4 (PDE4) inhibitors for the treatment of psoriasis: Insights from computer aided drug design approaches. PLoS ONE 19(11): e0305934. <https://doi.org/10.1371/journal.pone.0305934>

**Editor:** Sheikh Arslan Sehgal, Cholistan University of Veterinary and Animal Sciences, PAKISTAN

**Received:** April 22, 2024

**Accepted:** June 7, 2024

**Published:** November 13, 2024

**Copyright:** © 2024 Alanzi et al. This is an open access article distributed under the terms of the [Creative Commons Attribution License](https://creativecommons.org/licenses/by/4.0/), which permits unrestricted use, distribution, and reproduction in any medium, provided the original author and source are credited.

**Data Availability Statement:** All relevant data are within the paper.

**Funding:** The author(s) received no specific funding for this work.

**Competing interests:** The authors have declared that no competing interests exist.

## 1. Introduction

Psoriasis is a prevalent chronic immune-mediated inflammatory disorder characterized by numerous comorbidities, erythematous plaques with silvery scale, and considerable effects on the quality of life [1,2]. People of all ages are impacted by psoriasis, which has a global prevalence of 0.5 to 11.4% in adults and 0 to 1.4% in children [3,4]. Although the precise etiology of psoriasis remains unclear, a complex interplay of immune system, environmental, and genetic factors is thought to be responsible. Tumor necrosis factor (TNF)- $\alpha$ , interleukin (IL)-12, IL-17, IL-22, IL-23, and interferon (IFN)- $\gamma$  are among the several inflammatory mediators involved in the immunopathogenesis of psoriasis [5,6].

There are several ways to treat psoriasis: topical corticosteroids, calcipotriol, and retinoids; oral conventional systemic treatments that suppress the immune system broadly; and biological therapies that target particular receptors or cytokines to regulate inflammation downstream [6,7]. The severity of the disease often determines the course of treatment; moderate-to-severe diseases are typically controlled with topical therapy, while severe diseases require systemic therapy. Despite being widely used and frequently successful in treating psoriatic plaques, topical corticosteroids (TCS) have long-term side effects that restrict their use, including striae and atrophy [8,9]. The goals of managing psoriasis remain the same regardless of the treatment option selected: to offer a highly effective treatment that targets a range of inflammatory mediators involved in the pathogenesis of psoriasis, while guaranteeing a favorable safety profile and minimal side effects [5].

Among psoriasis treatments, phosphodiesterase-4 (PDE4) inhibitors are emerging as promising options. PDE4 is an enzyme found in cells throughout the body that regulates intracellular signaling by degrading cyclic adenosine monophosphate (cAMP), a critical messenger molecule involved in many cellular processes [5]. Phosphodiesterase 4 (PDE4) inhibitors can effectively treat inflammation in various tissues/organs caused by conditions such as psoriasis, chronic obstructive pulmonary disease (COPD), asthma, and Alzheimer's disease [10–12]. PDE4 inhibitors used in drug therapy have been shown to have some advantages over conventional formulations, such as increased sensitivity to selective inhibitors, unique tissue distribution, and ease of oral administration. By inhibiting PDE4 activity, cAMP levels rise, leading to suppression of immune cell activation and downregulation of pro-inflammatory cytokines, both of which are critical processes in the pathogenesis of psoriasis [4]. Many PDE4 inhibitors have been discovered over time, and some of these substances have moved on to clinical trials. Adverse events such as vomiting, headache, nausea, weight loss, and depression have been reported, which may limit use in some patients. Because PDE-4 inhibitors are small molecules, they can be applied topically; thus, topical PDE-4 inhibitors are currently being studied with the goal of avoiding systemic side effects [5,13,14].

The discovery of novel PDE4 inhibitors for psoriasis treatment using *insilico* methods requires a combination of computational techniques and molecular modeling. Researchers can efficiently screen large chemical libraries for potential PDE4 inhibitors using advanced computational tools like molecular docking, virtual screening, and molecular dynamics simulations. Virtual screening effectively reduces the enormous number of options to a manageable set of promising compounds by using computational techniques to predict how various molecules will interact with a target protein. This speeds up the early stages of drug development, reduces the need for extensive laboratory experiments, and aids in the identification of novel compounds that would otherwise go undetected using traditional methods. Hence, virtual screening improves the efficiency, speed, and innovation in the drug discovery process [15–17]. Hence, in the current study, virtual screening in combination with molecular docking was used to find possible PDE4 inhibitors.

## 2. Methodology

### 2.1. Development of pharmacophore hypothesis

The crystal structure coordinates of the PDE4 (PDB ID: 7W4X) were obtained from Protein Data Bank (<https://www.rcsb.org/>). The refined structure of PDE4 protein was subjected to Maestro workspace. The structure was minimized and then the receptor cavity based pharmacophore model was developed by Phase tool of Schrödinger [18]. The hypothesis was developed by choosing the receptor cavity and the binding pocket residues were selected manually.

Prior to developing the hypothesis, the receptor was prepared by following the steps explained in section 2.4.

## 2.2. Compound library preparation and virtual screening

The Diversity library of ChemDiv database containing 38646 compounds was retrieved and processed for database preparation through Phase [18]. To increase the chemical space search, twenty conformers of each compound were generated at pH by Epik [19]. Additionally, the high energy tautomer was removed. After preparing the database, the developed pharmacophore hypothesis was employed for virtual screening. The output of the screening was analyzed by phase screen score. The phase screen score is a combination of RMSD site matching, volume score, and vector alignments. The hits that met with the selection criteria of 1.5 phase score were selected for the molecular docking studies.

## 2.3. Molecular docking studies

The refined structure of PDE4 protein was processed for the preparation for molecular docking preparation wizard [20]. The preparation involved three steps: preprocessing, optimization, and minimization. In the preprocessing, the hydrogen atoms were added, extra chains were removed, the charges were added, and the side chain atoms of residues were fixed. Further, the tautomeric states were generated by PROPKA [21]. The hydrogen atoms were optimized at pH 7.0. and then the energy of structure was minimized by using OPLS2005 forcefield [22]. The processed structure was subjected for grid generation by selecting the predicted binding site residues. The X, Y, and Z coordinates of generated grid were 24.03, 2.80, and -25.75, respectively. Further, the screened hits were prepared by LigPrep tool [23] and docked to the prepared structure.

## 2.4. Prediction of bioactivity scores

The biological activity of the selected compounds was predicted by using the Molinspiration tool (<https://www.molinspiration.com/>). The bioactivity of a drug can be impacted by the chemical structure of compound, its potency and lastly the selection of target. A potent drug candidate is expected to bind with the target enzyme or receptor with stability and it will deliver the therapeutic benefits after binding with the receptors and produce fewer side effects as compared to the compounds with lower potency [24]. The bioactivity scores of the compounds selected at the docking steps were predicted against the GPCR, the kinase proteins, several ion channels, proteases, and the inhibitors of enzymes.

## 2.5. ADMET analysis

The higher rate of drug erosion is often attributed to issues related to toxicity and poor pharmacokinetics [25]. To address these challenges, ADMET properties are predicted to assess the pharmacokinetic properties and toxicity risks associated with potential drug candidates [26]. This predictive approach also helps in evaluating the likelihood of lead compounds becoming viable oral drugs. In this study, we used Maestro's QikProp tool [27] to predict the ADMET characteristics of the most promising compounds. Molecular weight, hydrogen bond donors and acceptors, QPlogBB, QPPCaco, QPlogKhsa, QPlogPo/w, and QPlogHERG were significant characteristics. Hydrogen bond donors and acceptors are metrics that quantify the amount of atom centers and hydrogen atoms available for participating in interactions involving hydrogen bonds. The logarithm of the octanol and water partition coefficient is predicted by QPlogPo/w, which provides information about the compound's membrane permeability

and hydrophobicity. QPlogHERG assesses the potential of a ligand to block the hERG potassium channel, providing information about the likelihood of cardiac toxicity. QPPCaco is a model for intestinal absorption that determines a compound's permeability over the monolayer of Caco-2 cells. The substance's ability to penetrate the blood-brain barrier and reach the central nervous system is indicated by QPlogBB, which forecasts the BBB partition coefficient's logarithm. Finally, the logarithm of the binding affinity to human serum albumin, a necessary protein that influences drug distribution and binding efficiency, is determined by QPlogKhsa. Similarly, the toxicity profiles of the compounds were predicted by using the ProTox-II webtool (<https://tox.charite.de/prottox3/>). The insilico toxicity prediction of the compounds reduces the cost of experimentation. The toxicity properties such as Hepatotoxicity, Carcinogenicity, Immunogenicity, Mutagenicity, and Cytotoxicity were predicted and compared.

## 2.6. MD simulation

Desmond was employed to conduct Molecular Dynamics simulations lasting 100 ns for selected compounds [28]. The protein and ligand complexes were submitted to Molecular Dynamics simulations to evaluate their stability. MD simulations were used to evaluate the stability of complexes after several stages, including preprocessing, optimization, and reduction. The minimizing process was carried out using the OPLS\_2005 force field [22]. The complexes were solvated in a periodic box with a 10 Å size containing the TIP3P water molecules [29]. Neutralization of the systems was done by adding counter ions and the 0.15 M NaCl salt as needed to mimic physiological circumstances. The NPT ensemble was set to a temperature of 300 K and a pressure of 1 atm. Prior to the simulation initiation, the systems underwent a relaxation phase. Trajectories were recorded and saved at 40 ps intervals during the simulation, enabling subsequent analysis of the obtained results.

## 2.7. Binding free energy calculations

The binding free energies of the selected complexes were calculated by employing the Prime-MMGBSA module of Schrödinger [30]. The presence of the counter ions in the system was stripped and the VSGB solvent model along with OPLS\_2005 forcefield were employed to calculate the binding free energy ( $\Delta G_{\text{bind}}$ ). The calculations were conducted by using Eq 1. The binding free energy is the difference between complex free energy and the free energy of protein and ligand. The free energy terms used during the calculation were  $\Delta G_{\text{coulomb}}$ ,  $\Delta G_{\text{covalent}}$ ,  $\Delta G_{\text{Hbond}}$ ,  $\Delta G_{\text{Lipo}}$ ,  $\Delta G_{\text{Packing}}$ ,  $\Delta G_{\text{vdW}}$ ,  $\Delta G_{\text{straining energy}}$ , and  $\Delta G_{\text{Solv\_Gb}}$ .

$$\Delta G_{\text{Bind}} = \Delta G_{\text{complex}} - (\Delta G_{\text{protein}} + \Delta G_{\text{ligand}}) \quad (1)$$

## 3. Results

### 3.1. Pharmacophore hypothesis development

The crystal structure was subjected to the workspace of Maestro and optimized for the binding sites prediction. Prior to the binding sites prediction, the structure was validated by calculating the ERRAT quality factor and by observing the Ramachandran plot. A good structure usually shows an average overall quality factor of about 90% for the ERRAT score. The ERRAT quality factor of the PDE4 structure was 98% (Fig 1A). Similarly, the Ramachandran plot of the protein showed that all residues were in the favored region while no residue was observed in disallowed region (Fig 1B). The binding pocket residues were predicted and then selected to generate the pharmacophore hypothesis containing a total of seven features. The

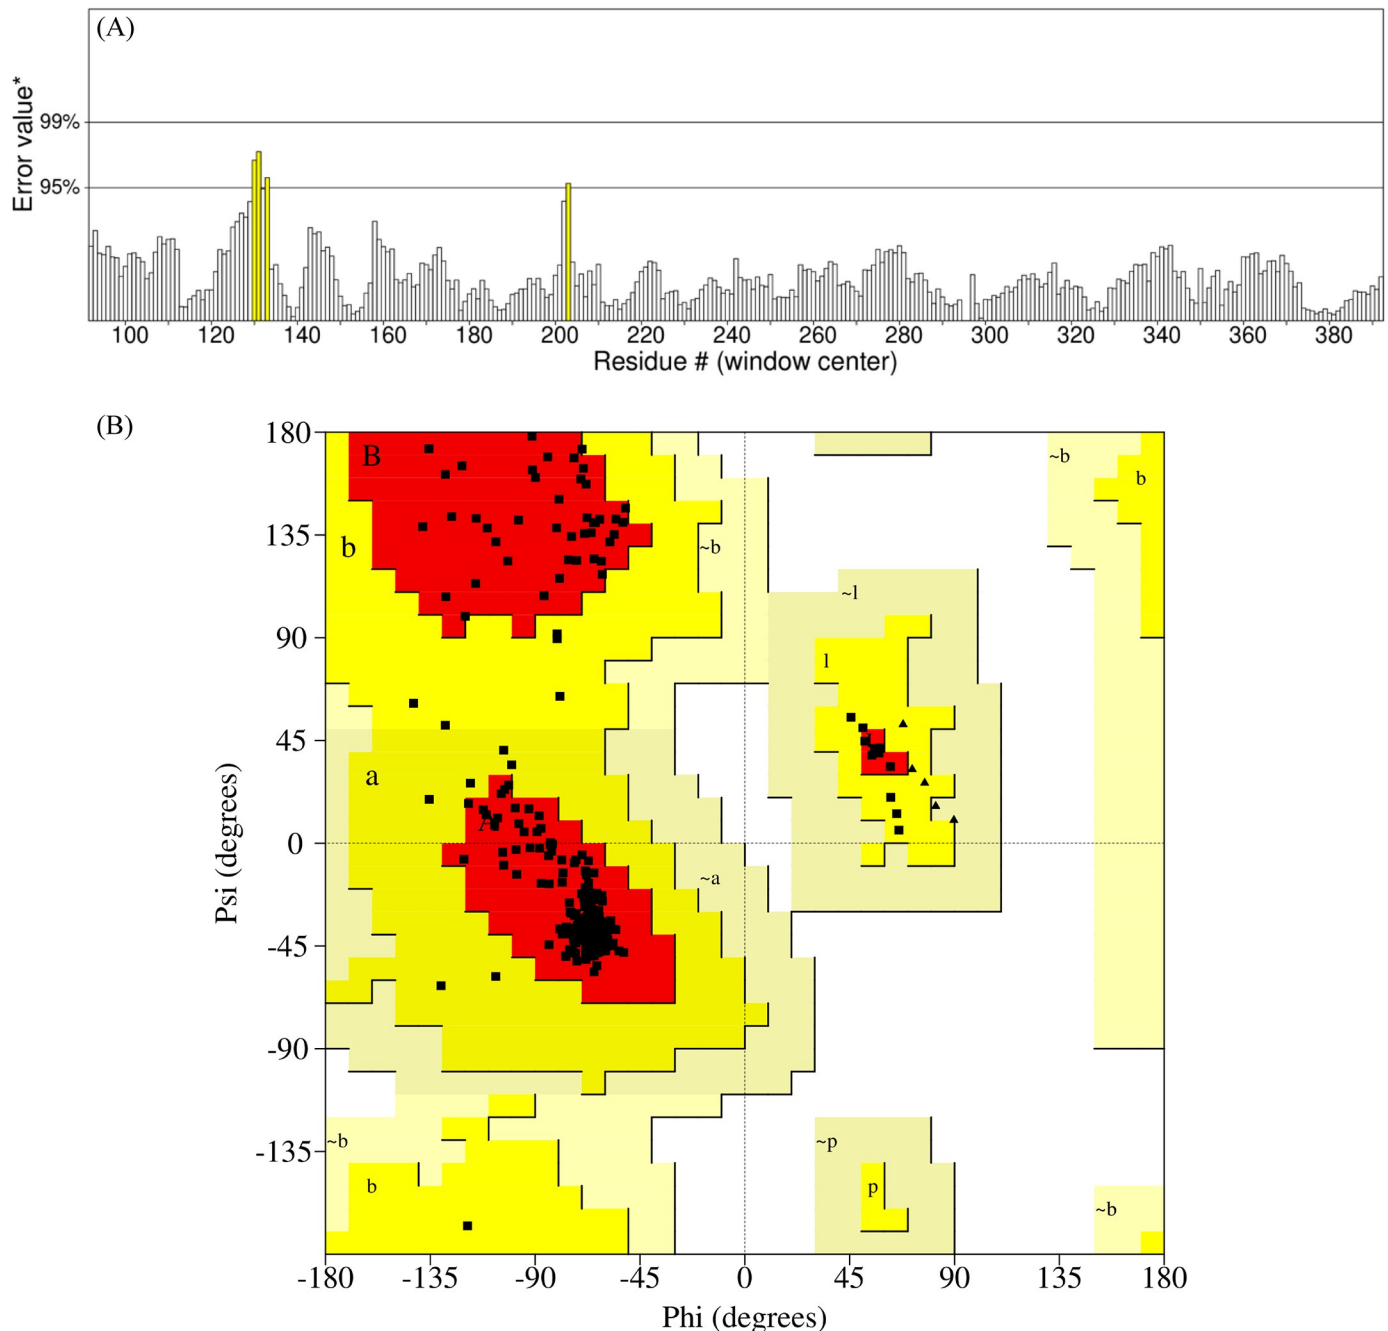

**Fig 1.** (A) The ERRAT quality factors of PDE4 structure. (B) Ramachandran plot. The yellow region shows the allowed region while the white region shows the disallowed regions.

<https://doi.org/10.1371/journal.pone.0305934.g001>

pharmacophore hypothesis contained seven features, R1981, A456, H1525, D953, D1041, D963, R2081 (Table 1) shown in Fig 2A and 2B.

### 3.2. Virtual screening of CNS library

The developed pharmacophore model was employed for the virtual screening of CNS library of the ChemDiv database. During screening, a compound that matched at least four features

**Table 1.** The pharmacophore hypothesis features along with scores and coordinates in the receptor cavity.

| Rank | Feature Label | Score | X       | Y      | Z        |
|------|---------------|-------|---------|--------|----------|
| 1    | R1981         | -2.81 | 22.8124 | 3.0185 | -22.3465 |
| 2    | D953          | -2.2  | 24.9696 | 4.2669 | -21.4469 |
| 3    | D1041         | -2.18 | 19.6692 | 0.9717 | -25.3118 |
| 4    | D963          | -2.13 | 21.144  | -0.199 | -33.1458 |
| 5    | A456          | -1.63 | 23.4318 | 0.915  | -33.9508 |
| 6    | H1525         | -1.55 | 23.1533 | 2.405  | -24.241  |
| 7    | R2081         | -1.48 | 25.1946 | 4.1546 | -25.5467 |

<https://doi.org/10.1371/journal.pone.0305934.t001>

was selected as a hit. The screened hits were ranked by the phase screen score which is a combination of Volume score, RMSD site matching, and vector alignments. For better alignment, the vector score must be high in the range of -1.0 to 1.0. Similarly, the reference range for volume is 0.0 to 1.0 where high score shows the greater overlaps among the volume of reference ligand and aligned ligands. It is calculated by dividing the volume of aligned ligands by the volume of the total volume of two ligands, a zero score shows no reference ligand. The potential hits were identified by setting a cutoff phase screen score of 1.5. The compounds with 1.0 phases scores are given in Table 2.

### 3.3. Molecular docking

The hits generated during the virtual screening were prepared and docked to the PDE4 receptor by SP docking module of glide. The docking poses were analyzed based on the glide gscore and molecular interactions of the docked compounds. The compounds with binding affinities greater than -7 kcal/mol were selected for further analysis. The two-dimensional structures of the selected hits are shown in Fig 3. The molecular interactions of the selected docked hits

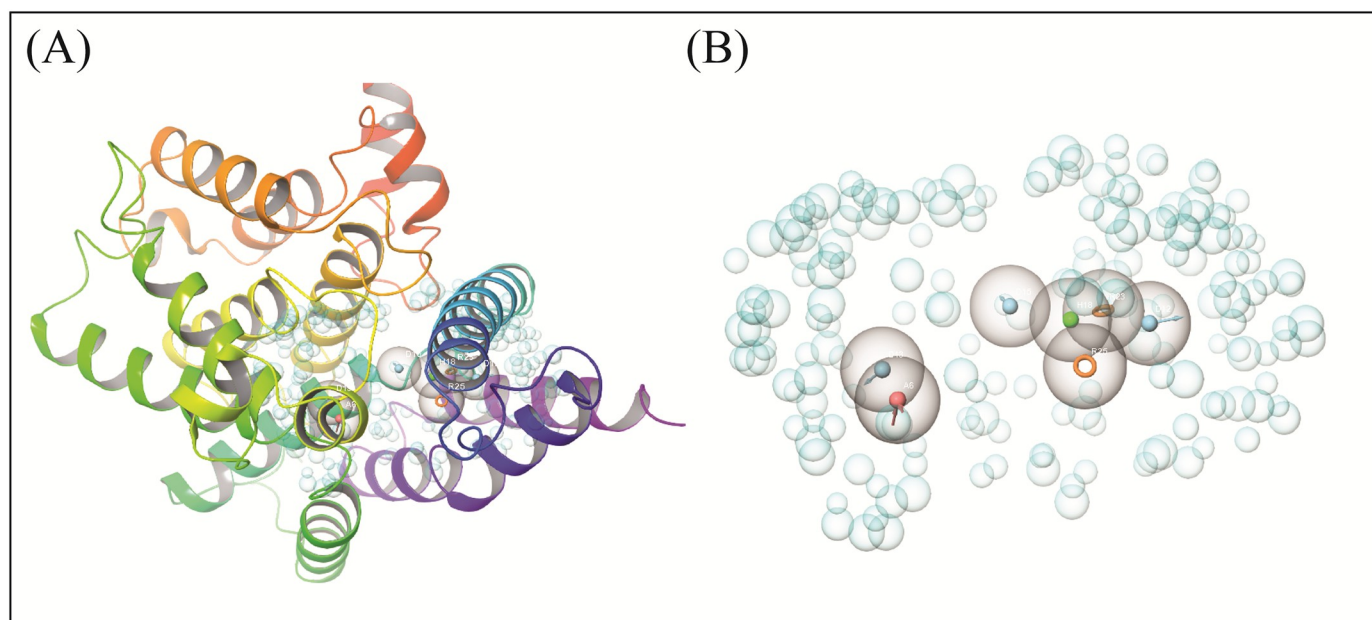

**Fig 2.** The developed pharmacophore models. (A) The pharmacophoric features shown in the protein pocket. (B) The receptor cavity along with the pharmacophoric features.

<https://doi.org/10.1371/journal.pone.0305934.g002>



Table 2. The hits generated during virtual screening, selected based on the phase screen scores.

| No. | ChemDiv IDs | Phase Scores | No. | ChemDiv IDs | Phase Scores |
|-----|-------------|--------------|-----|-------------|--------------|
| 1   | 7752-0511   | 1.652        | 24  | 8561-08046  | 1.521        |
| 2   | 7752-0515   | 1.648        | 25  | D526-0065   | 1.519        |
| 3   | 8407-0222   | 1.599        | 26  | D526-0057   | 1.519        |
| 4   | D188-0139   | 1.571        | 27  | D526-0056   | 1.519        |
| 5   | 8211-0341   | 1.564        | 28  | D526-0009   | 1.518        |
| 6   | 8525-0815   | 1.563        | 29  | D526-0074   | 1.518        |
| 7   | 8525-0384   | 1.562        | 30  | D526-0079   | 1.518        |
| 8   | 8525-0381   | 1.56         | 31  | D526-0064   | 1.517        |
| 9   | D356-2630   | 1.554        | 32  | D733-0293   | 1.516        |
| 10  | 8525-0383   | 1.554        | 33  | D359-0432   | 1.508        |
| 11  | D526-0020   | 1.55         | 34  | D526-0091   | 1.507        |
| 12  | D526-0066   | 1.55         | 35  | F173-0395   | 1.505        |
| 13  | G289-0060   | 1.548        | 36  | D526-0059   | 1.505        |
| 14  | D526-0067   | 1.548        | 37  | D526-0010   | 1.504        |
| 15  | D526-0022   | 1.529        | 38  | D526-0091   | 1.504        |
| 16  | G842-0420   | 1.527        | 39  | F173-0406   | 1.503        |
| 17  | D526-0021   | 1.523        | 40  | F173-0425   | 1.503        |
| 18  | D526-0075   | 1.522        | 41  | F403-0203   | 1.502        |
| 19  | F403-0096   | 1.522        | 42  | D526-0091   | 1.502        |
| 20  | D526-0068   | 1.522        | 43  | D526-0020   | 1.502        |
| 21  | D356-2542   | 1.521        | 44  | C202-3703   | 1.501        |
| 22  | D526-0055   | 1.521        | 45  | D526-0138   | 1.501        |
| 23  | D359-0006   | 1.521        | 46  | C700-2058   | 1.5          |

<https://doi.org/10.1371/journal.pone.0305934.t002>

were analyzed, and it was observed that **D356-2630** made five hydrogen bonds with Asp318, His204, Tyr159, His233, Glu230 and five hydrophobic interactions with Phe372, Ile336, met273, Leu229, and Asp201. **D356-2542** made two hydrogen bonds with Asp318, His160 and three alkyl interactions with Phe340, Phe372, and Ile336. **8525-0383** was engaged in hydrogen bonding with Asp318, His204, His160, Asp201, Asn321. It also made hydrophobic interactions with Phe372, Phe340, Ile336, Leu319. Similarly, **C700-2058** made five hydrogen bonds with Glu339, His204, Asp201, Glu230, Ser208. **D359-0432** made hydrogen bonds with Asp318, Gln369, Thr271 during docking while **G842-0420** participated in hydrogen bonding with the residues Asn321, Tyr159, His160, Trp332. **G289-0060** made hydrogen bonds with Asp318, His204, Asp201, Glu230, Tyr159. At last, **8525-0381**, **7752-0515**, **F403-0203** made hydrogen bonds with Asp318, His204, Asp201, Asn321, Asp318, Asp201, Asn321, Ser208, Asp318, His160, and Asp201 (Fig 4). The docking scores, interacting residues, interaction types, and the distance between ligand and hydrogen bond forming residues are given in Table 3. Further, the plausible binding modes of the docked ligands were analyzed, and it was observed that all ten selected ligands occupied the same space in the predicted binding pocket of protein (Fig 5).

### 3.4. Bioactivity scores

The bioactivity scores of the compounds help to analyze the drug binding ability to various human receptors. The bioactivity scores of the selected seven compounds were predicted by Molinspiration tool. The predicted scores of the compounds against several receptors are shown in Table 4, indicating that the scores were in the range of -5 to 0.0. showing the

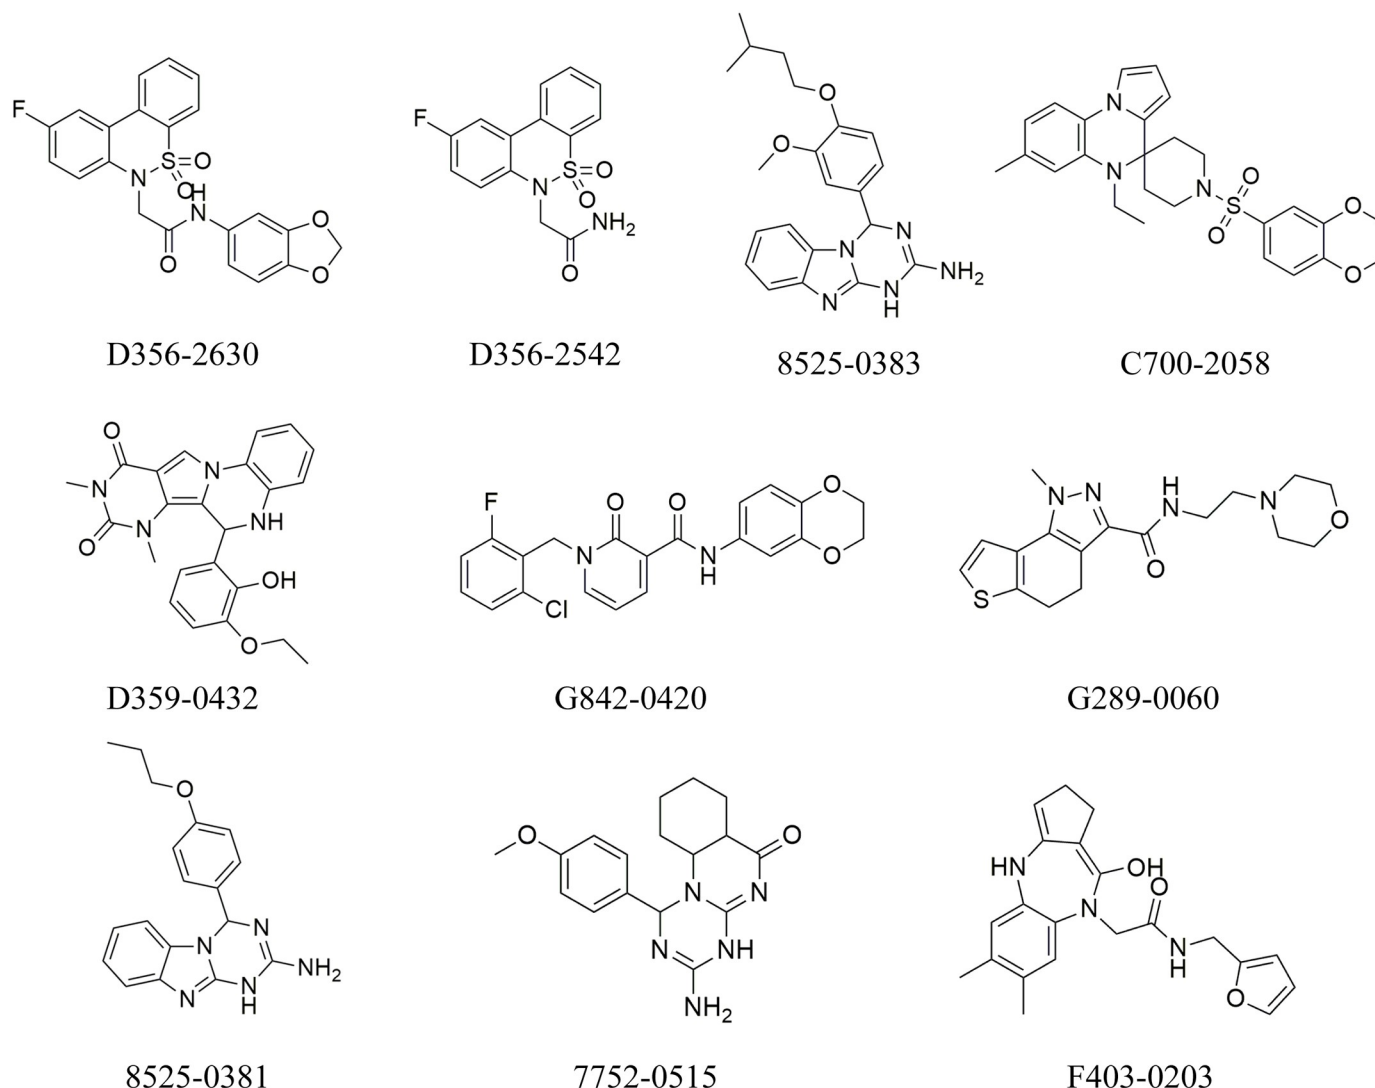

Fig 3. The molecular structures of the compounds selected based on the binding affinities.

<https://doi.org/10.1371/journal.pone.0305934.g003>

moderate activity of these compounds against the receptors. Some compounds showed scores close to zero, indicating good activity against the receptors. The analysis revealed that the selected compounds have the properties of lead compounds.

### 3.5. ADMET analysis

QikProp was used to predict the ADMET characteristics of the selected compounds, and it was found that the expected values fell within an acceptable range. The molecular weight of a compound indicates its easy distribution in the cells so the compounds with less weight can easily distribute in the body as compared to the compounds with higher weight. In this regard, a criterion of 500 g/mol was set, and all the molecular weights of all selected compounds fall within this range. QPlogPo/w determines the octanol/water partition coefficient, a value within a range of 1.0 to 4 is good. The values of selected hits fall within this range. The compounds that were selected had anticipated ADMET qualities that are within the acceptable



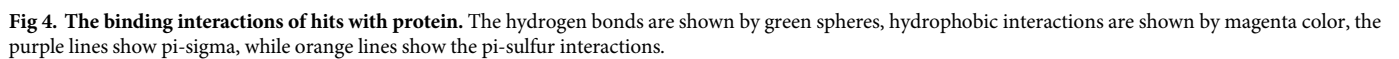

<https://doi.org/10.1371/journal.pone.0305934.g004>

**Table 3. The docking scores, interacting residues and the hydrogen bond distances of the selected compounds with protein.**

| ChemDiv IDs | Glide scores | Hydrogen Bonds Distance (Å)                                          | Hydrophobic Interactions                       |
|-------------|--------------|----------------------------------------------------------------------|------------------------------------------------|
| D356-2630   | -8.062       | Asp318(2.02), His204(2.19), Tyr159(2.75), His233(2.35), Glu230(2.29) | Phe372, Ile336, met273, Leu229, Asp201         |
| D356-2542   | -7.99        | Asp318(1.77), His160(2.03)                                           | Phe340, Phe372, Ile336                         |
| 8525-0383   | -7.942       | Asp318(1.65), His204(2.76), His160(2.34), Asp201(1.94), Asn321(2.83) | Phe372, Phe340, Ile336, Leu319                 |
| C700-2058   | -7.853       | Glu339(2.58), His204(1.86), Asp201(2.36), Glu230(2.46), Ser208(4.06) | Ile336, Phe372, Phe340, tyr159, Leu229, His233 |
| D359-0432   | -7.779       | Asp318(2.06), Gln369(2.31), Thr271(2.72)                             | Phe372, Ile336, Met357, Met273                 |
| G842-0420   | -7.317       | Asn321(2.61), Tyr159(2.19), His160(2.80), Trp332(2.30)               | Phe372, Ile336, Met273                         |
| G289-0060   | -7.298       | Asp318(2.13), His204(1.86), Asp201(2.97), Glu230(2.79), Tyr159(2.40) | Phe340, Met357, Phe372, Ile336                 |
| 8525-0381   | -7.286       | Asp318(2.04), His204(2.61), Asp201(1.94), Asn321(2.70)               | His160, Tyr159, Ile336                         |
| 7752-0515   | -7.088       | Asp318(1.95), Asp201(2.26), Asn321(2.49), Ser208(3.49)               | Ile336, Tyr159, Met273                         |
| F403-0203   | -7.07        | Asp318(1.89), His160(2.12), Asp201(2.90)                             | Phe340, Met273, Phe372, Ile336, Tyr159, His204 |

<https://doi.org/10.1371/journal.pone.0305934.t003>

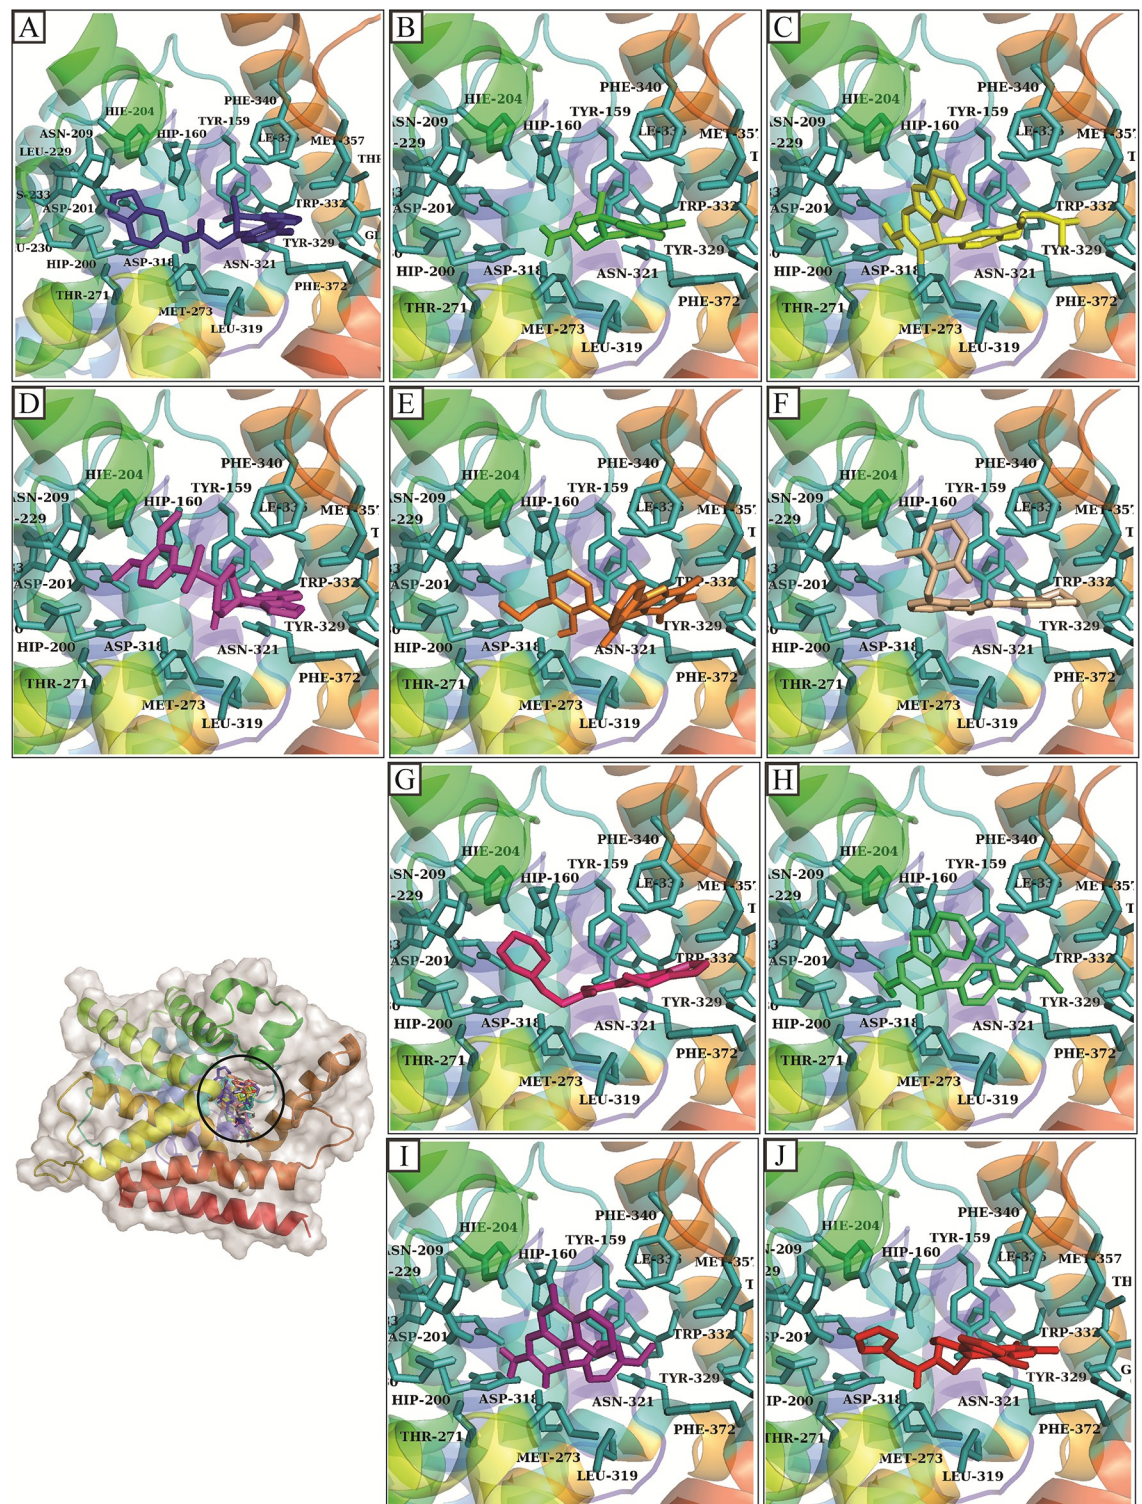

**Fig 5.** The plausible binding modes of the selected compounds are represented with the sticks in the binding pocket of protein. The orientation of the hits is also shown in the pocket separately. (A) D356-2630 (B) D356-2542 (C) 8525-0383 (D) C700-2058 (E) D359-0432 (F) G842-0420 (G) G289-0060 (H) 8525-0381 (I) 7752-0515 (J) F403-0203.

<https://doi.org/10.1371/journal.pone.0305934.g005>

Table 4. The predicted bioactivity scores of the selected compounds against different human receptors.

| ChemDiv IDs | GPCR ligand | Ion channel modulator | Kinase inhibitor | Nuclear receptor ligand | Protease inhibitor | Enzyme inhibitor |
|-------------|-------------|-----------------------|------------------|-------------------------|--------------------|------------------|
| D356-2630   | 0.01        | -0.23                 | -0.44            | -0.25                   | -0.01              | -0.31            |
| D356-2542   | 0.14        | -0.06                 | -0.53            | -0.19                   | 0.16               | -0.26            |
| 8525-0383   | -0.32       | -0.59                 | -0.51            | -0.91                   | -0.50              | -0.44            |
| C700-2058   | -0.05       | -0.28                 | -0.40            | -0.40                   | -0.20              | -0.31            |
| D359-0432   | -0.29       | -0.51                 | -0.69            | -0.51                   | -0.63              | -0.37            |
| G842-0420   | -0.13       | -0.48                 | -0.04            | -0.36                   | -0.36              | -0.23            |
| G289-0060   | 0.14        | -0.42                 | 0.44             | -0.30                   | -0.11              | -0.08            |
| 8525-0381   | -0.38       | -0.67                 | -0.58            | -1.00                   | -0.61              | -0.48            |
| 7752-0515   | -0.51       | -0.65                 | -0.62            | -1.00                   | -0.72              | -0.46            |
| F403-0203   | -0.35       | -0.64                 | -0.74            | -0.65                   | -0.46              | -0.36            |

<https://doi.org/10.1371/journal.pone.0305934.t004>

range, as demonstrated, in Table 5. Similarly, ProTox-II server predicted the toxicity profiles of the compounds. It can be observed that all the hits showed toxicity class 4 except for D356-2542 and C700-2058 which showed toxicity class 6 and 3 respectively (Table 6). Additionally, 8525-0383, G289-0060, 8525-0381, and 7752-0515 showed active profiles for one or two parameters of hepatotoxicity, carcinogenicity, immunotoxicity, mutagenicity, and cytotoxicity. After ADMET analysis, four compounds **D356-2630**, **C700-2058**, **G842-0420** and **F403-0203** showed better QPPCaco values so these were selected for further stability analysis.

### 3.6. MD simulation

After the ADMET analysis, four compounds with highest drug-likeness and not toxicity risks were selected for the stability analysis by conducting 100 ns simulation. The MD trajectories were analyzed by measuring the RMSD, RMSF, Protein-ligand contacts, PCA, and drawing the 2D PCA based free energy diagrams.

**3.6.1. RMSD.** The RMSD of carbon alpha atoms of protein was calculated and aligned with ligand atoms RMSD to investigate the stability of protein ligand complex [31]. It can be observed that the RMSD of **D356-2630** complex deviated in the range of 0.9–2.1 Å till 30 ns and then attained stability in the range of 1.5–2.4 Å till the end of simulation, while the RMSD of ligand was fitted on the protein (Fig 6A). The RMSD of carbon alpha atoms of **C700-2058** complex started at 0.9 Å and increased to 2.1 Å and then stayed between the range of 1.3–2.4 Å

Table 5. The ADMET and toxicity risks analysis of the selected hits.

| Compounds | MW      | HBD | HBA | QPlogPo/w | QPlogHERG | QPPCaco  | QPlogBB | QPlogKhsa |
|-----------|---------|-----|-----|-----------|-----------|----------|---------|-----------|
| D356-2630 | 426.418 | 1   | 8   | 2.773     | -5.567    | 1365.029 | -0.323  | -0.106    |
| D356-2542 | 306.311 | 2   | 7   | 0.493     | -3.4      | 175.083  | -0.837  | -0.685    |
| 8525-0383 | 379.461 | 3   | 5   | 3.968     | -5.865    | 653.108  | -1.089  | 0.59      |
| C700-2058 | 481.609 | 0   | 7   | 4.513     | -4.538    | 1972.66  | -0.372  | 0.481     |
| D359-0432 | 418.451 | 2   | 6   | 3.836     | -6.003    | 464.089  | -1.049  | 0.675     |
| G842-0420 | 414.82  | 0   | 6   | 4.197     | -6.092    | 2488.033 | -0.107  | 0.201     |
| G289-0060 | 346.446 | 1   | 7   | 2.495     | -5.419    | 760.416  | 0.323   | 0         |
| 8525-0381 | 321.381 | 3   | 4   | 3.156     | -5.75     | 624.636  | -0.918  | 0.323     |
| 7752-0515 | 321.338 | 3   | 6   | 1.616     | -5.114    | 218.402  | -1.137  | -0.043    |
| F403-0203 | 365.431 | 3   | 4   | 3.683     | -4.237    | 1741.637 | -0.417  | 0.291     |

"QPlogHERG" (<-5), "QPlogPo/w" (-2.0 to 6.5), "QPlogBB" (-3.0 to 1.2), "QPPCaco" (<25 poor, >500 great), and "QPlogKhsa" (-1.5 to 1.5).

<https://doi.org/10.1371/journal.pone.0305934.t005>



Table 6. The toxicity profiles of the selected hits.

| Compounds | Hepatotoxicity | Carcinogenicity | Immunotoxicity | Mutagenicity | Cytotoxicity | Predicted LD50 (mg/kg) | Toxicity Class |
|-----------|----------------|-----------------|----------------|--------------|--------------|------------------------|----------------|
| D356-2630 | Inactive       | Inactive        | Inactive       | Inactive     | Inactive     | 1250                   | 4              |
| D356-2542 | Inactive       | Inactive        | Inactive       | Inactive     | Inactive     | 5800                   | 6              |
| 8525-0383 | Inactive       | Active          | Active         | Inactive     | Inactive     | 1470                   | 4              |
| C700-2058 | Inactive       | Inactive        | Inactive       | Inactive     | Inactive     | 300                    | 3              |
| D359-0432 | Inactive       | Inactive        | Inactive       | Inactive     | Inactive     | 1000                   | 4              |
| G842-0420 | Inactive       | Inactive        | Inactive       | Inactive     | Inactive     | 540                    | 4              |
| G289-0060 | Inactive       | Active          | Inactive       | Inactive     | Inactive     | 1000                   | 4              |
| 8525-0381 | Inactive       | Active          | Inactive       | Inactive     | Inactive     | 450                    | 4              |
| 7752-0515 | Active         | Active          | Inactive       | Active       | Inactive     | 1000                   | 4              |
| F403-0203 | Inactive       | Inactive        | Inactive       | Inactive     | Inactive     | 1200                   | 4              |

<https://doi.org/10.1371/journal.pone.0305934.t006>

till the end of simulation while the RMSD of ligand atoms remained less than protein (Fig 6B). The RMSD of **G842-0420** (Fig 6C). complex attained stability at 40 ns in the range of two Å with the almost same RMSD value of ligand. Lastly, **F403-0203** (Fig 6D) the RMSD value stabilized in the range of 1.25–2.00 Å with the RMSD of ligand less than of protein. All our findings collectively demonstrate that the protein and ligand complexes stayed stable during MD

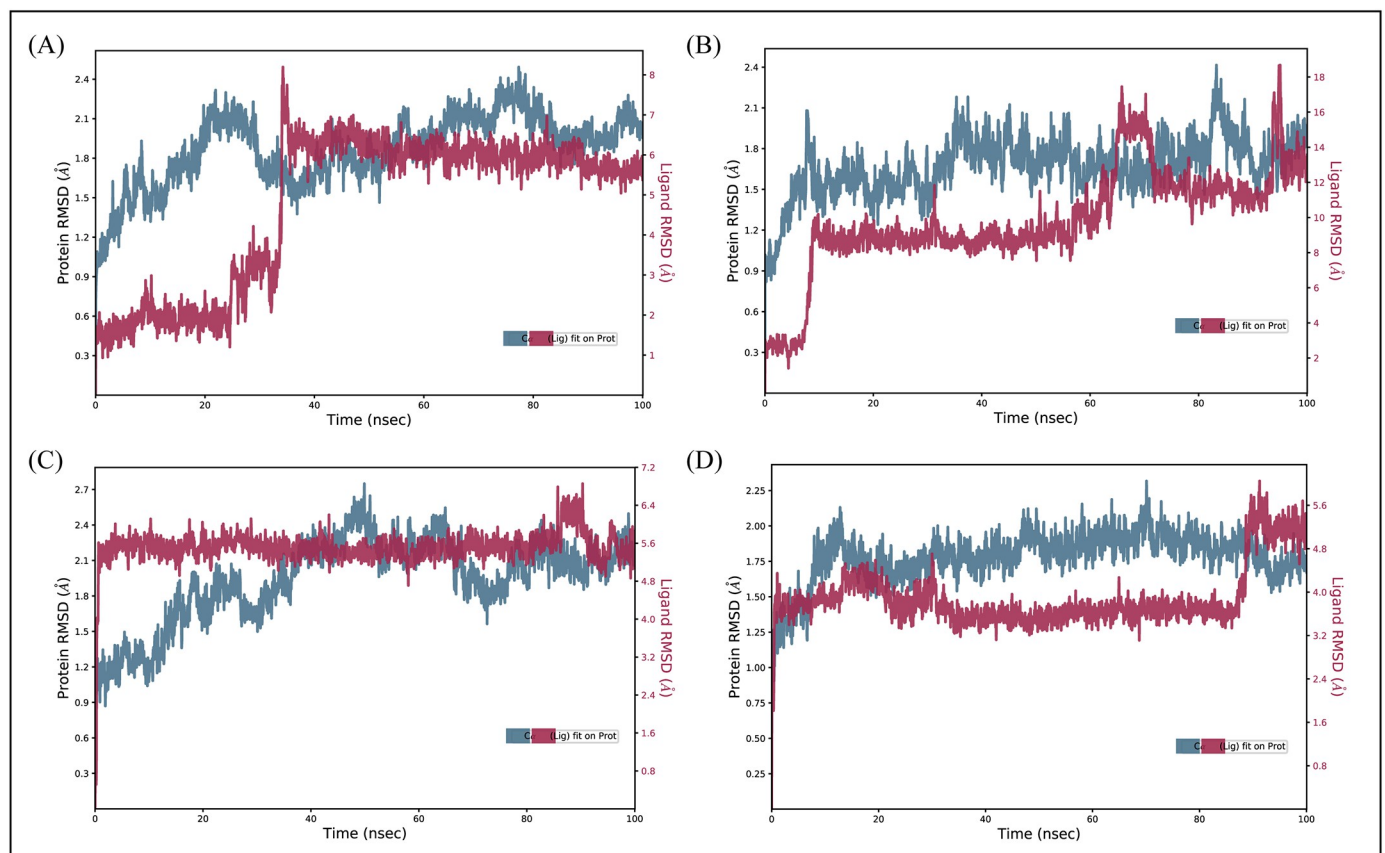

Fig 6. The RMSD protein along with selected hits calculated during simulation. (A) D356-2630 (B) C700-2058 (C) G842-0420 (D) F403-0203.

<https://doi.org/10.1371/journal.pone.0305934.g006>

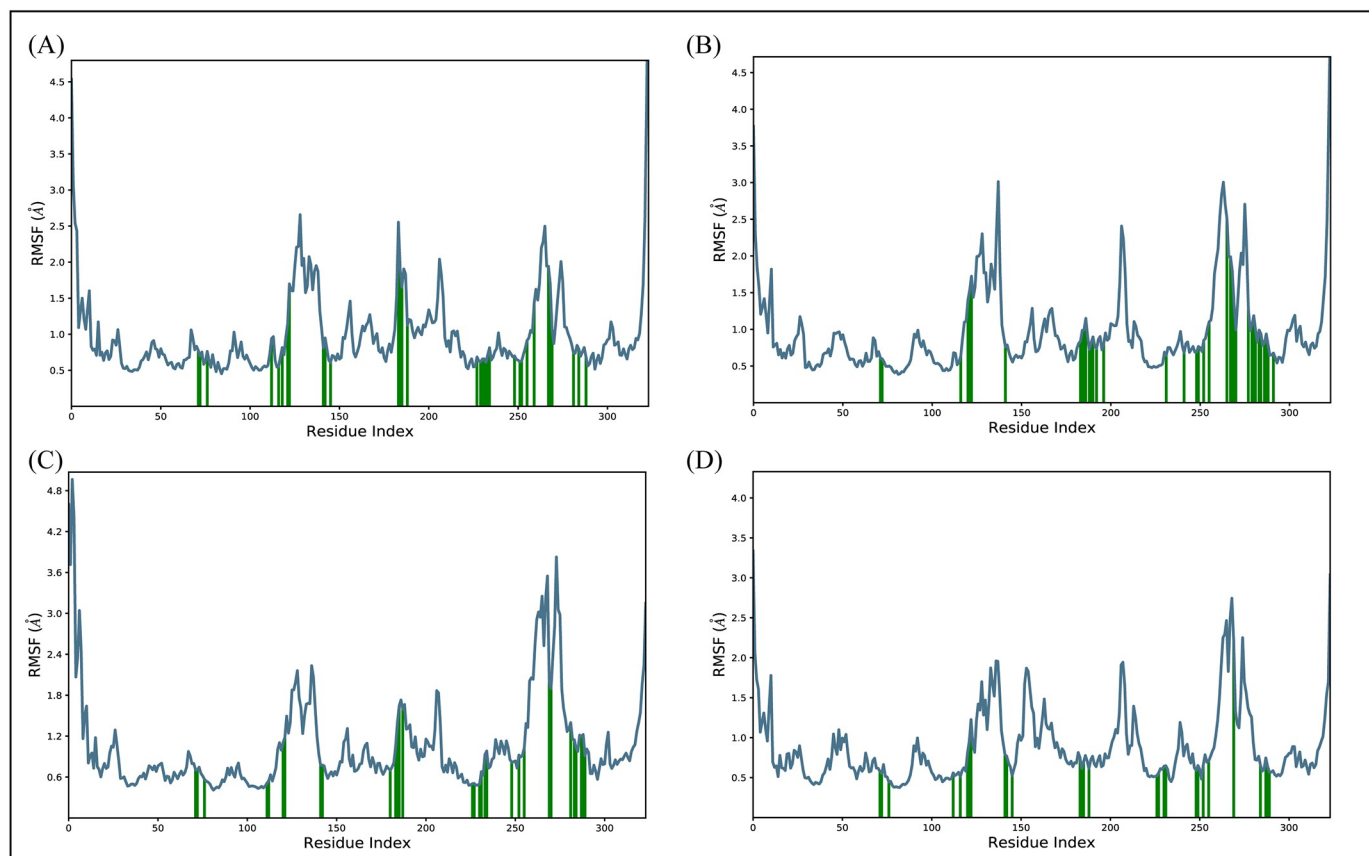

**Fig 7. The residual flexibility of the complexes during simulation along with the loop regions with higher fluctuations.** (A) D356-2630 (B) C700-2058 (C) G842-0420 (D) F403-0203.

<https://doi.org/10.1371/journal.pone.0305934.g007>

simulation, providing valuable new insight into their dynamic behavior and suitability for further investigation.

**3.6.2. RMSF.** Root mean square fluctuations (RMSF) values have been calculated in order to examine the fluctuating behavior of the proteins while they are bound to the ligands [32]. For each protein residue over the simulation period, RMSF values give detailed information on the residue's flexibility and mobility. Based on the expected RMSF values, most protein residues changed very slightly during the simulation, measuring less than 3 Å except for the loop regions L1, L2, and L3. This suggests that these residues maintained their relative stability in the presence of ligands. However, the loop regions of the protein exhibited higher RMSF values, which were around 4.5 Å (Fig 7). The residues that form the contacts with the ligand did not undergo any conformational changes and remained stably bound with the ligands. Overall, RMSF values are compatible with the idea of a stable protein and ligand.

**3.6.3. Protein-ligand contacts.** The MD Simulation analysis showed that ionic, hydrogen, and hydrophobic bonds were the most important types of interactions between the ligands and the protein. The functional properties of the protein-ligand complex are stabilized and regulated by these interactions. The residues that form hydrogen bonds with **D356-2630** were Tyr-159, His-160, His-204, Asp-318 and Gln-343. The residue that form ionic bond is Asp-318 (Fig 8A). In the **C700-2058** complex, residues involved in bonding with hydrogen were His-206, His-276 and Met-277 (Fig 8B). The hydrogen bonding in **G842-0420** complex was

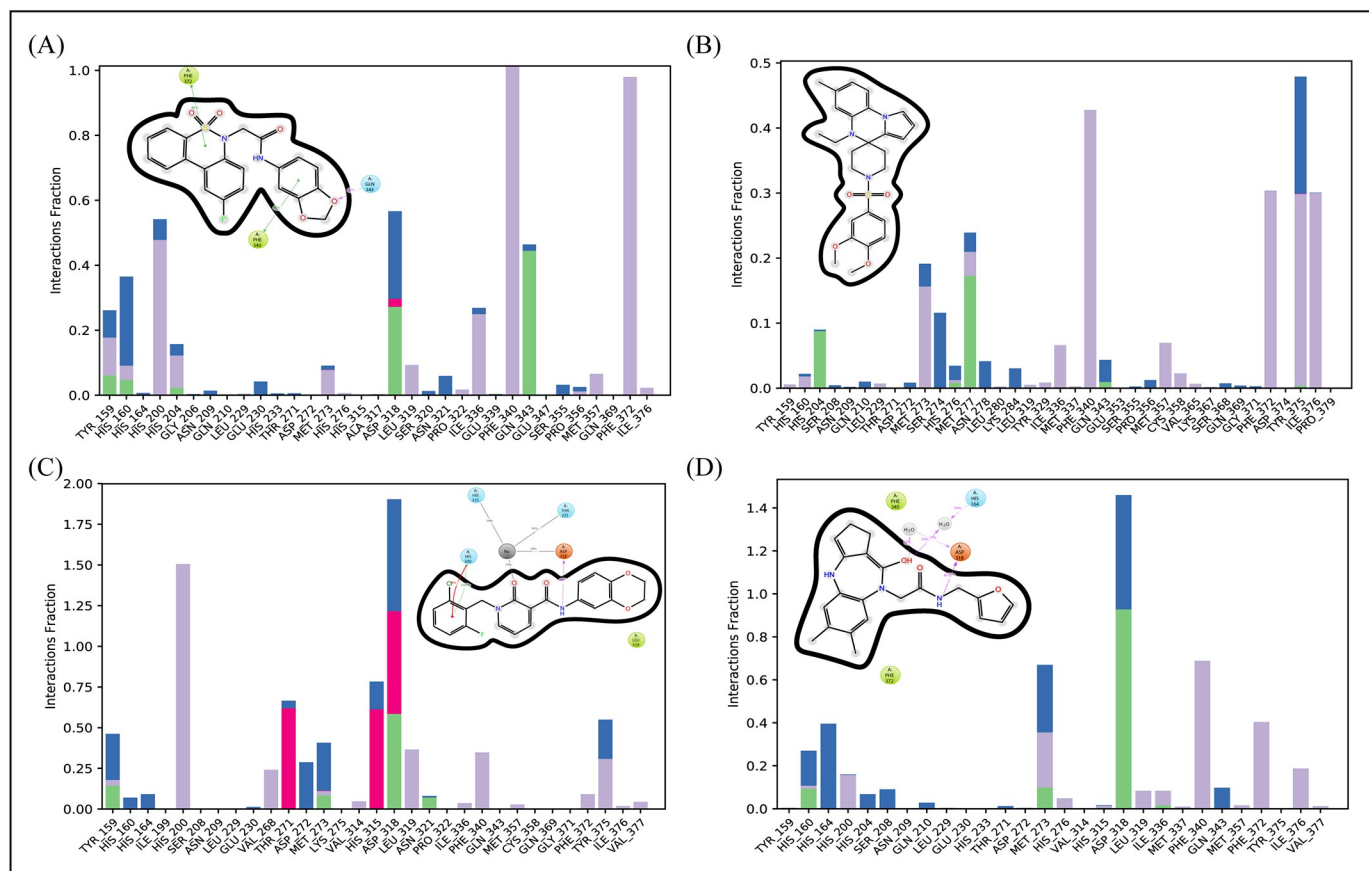

**Fig 8. The Protein-Ligand contacts generated during the 100 ns simulation.** (A) D356-2630 complex. (B) C700-2058 complex. (C) G842-0420 complex. (D) F403-0203 complex. Green shows hydrogen bonding, purple shows hydrophobic interactions, and blue shows the water bridges.

<https://doi.org/10.1371/journal.pone.0305934.g008>

observed in Tyr-159, Met-273, Asp-318 and Asn-32,1 while Thr-271, His-315, Asp-318 engaged in ionic bond (Fig 8C). Lastly, in **F403-0203** (Fig 8D). residues involved in bonding with hydrogen were Tyr-159, Met-273 and Asp-318. These hydrogen bonding interactions, which were displayed during the MD simulations, not only highlighted the specific residues that were crucial for stabilizing the protein-ligand complexes, but they also provided insight into the crucial interactions that underpin the complexes' general stability and binding affinity.

**3.6.4. Principal component analysis and PCA based free energy.** The principal component analysis (PCA) was performed to calculate the variance percentage in protein clusters. The dominant movements were observed in the first five eigenvectors in all complexes. The eigenvalues in **D356-2630** complex were 25.6, 41.5, 50.6, 55.6, 66.4 and 78.8% in the first five eigenvectors, respectively. The total variation was 78.8% while the highest fluctuations were observed in the PC1 (25.6%) (Fig 9A). Similarly, the eigen values in the first five eigenvectors of **C700-2058** were 15.5, 28.6, 35.9, 42.1, 57.8, and 75%, respectively. The total variation was 70%. The highest variation was observed in PC1 which recorded 15.5% fluctuations during the simulation (Fig 9B). The eigen values in the first five eigenvectors of **G842-0420** were 23.9,45,52.7,58.7,69.2 and 80.7% and total variation in the complex was 80.7% with the highest fluctuation in PC1 of 23.9% (Fig 9C). Lastly, eigenvalues in **F403-0203** complex 19.1,32.9,39.3,44.8,57.6 and 73% in the first five eigenvectors. The total variation was 73% with



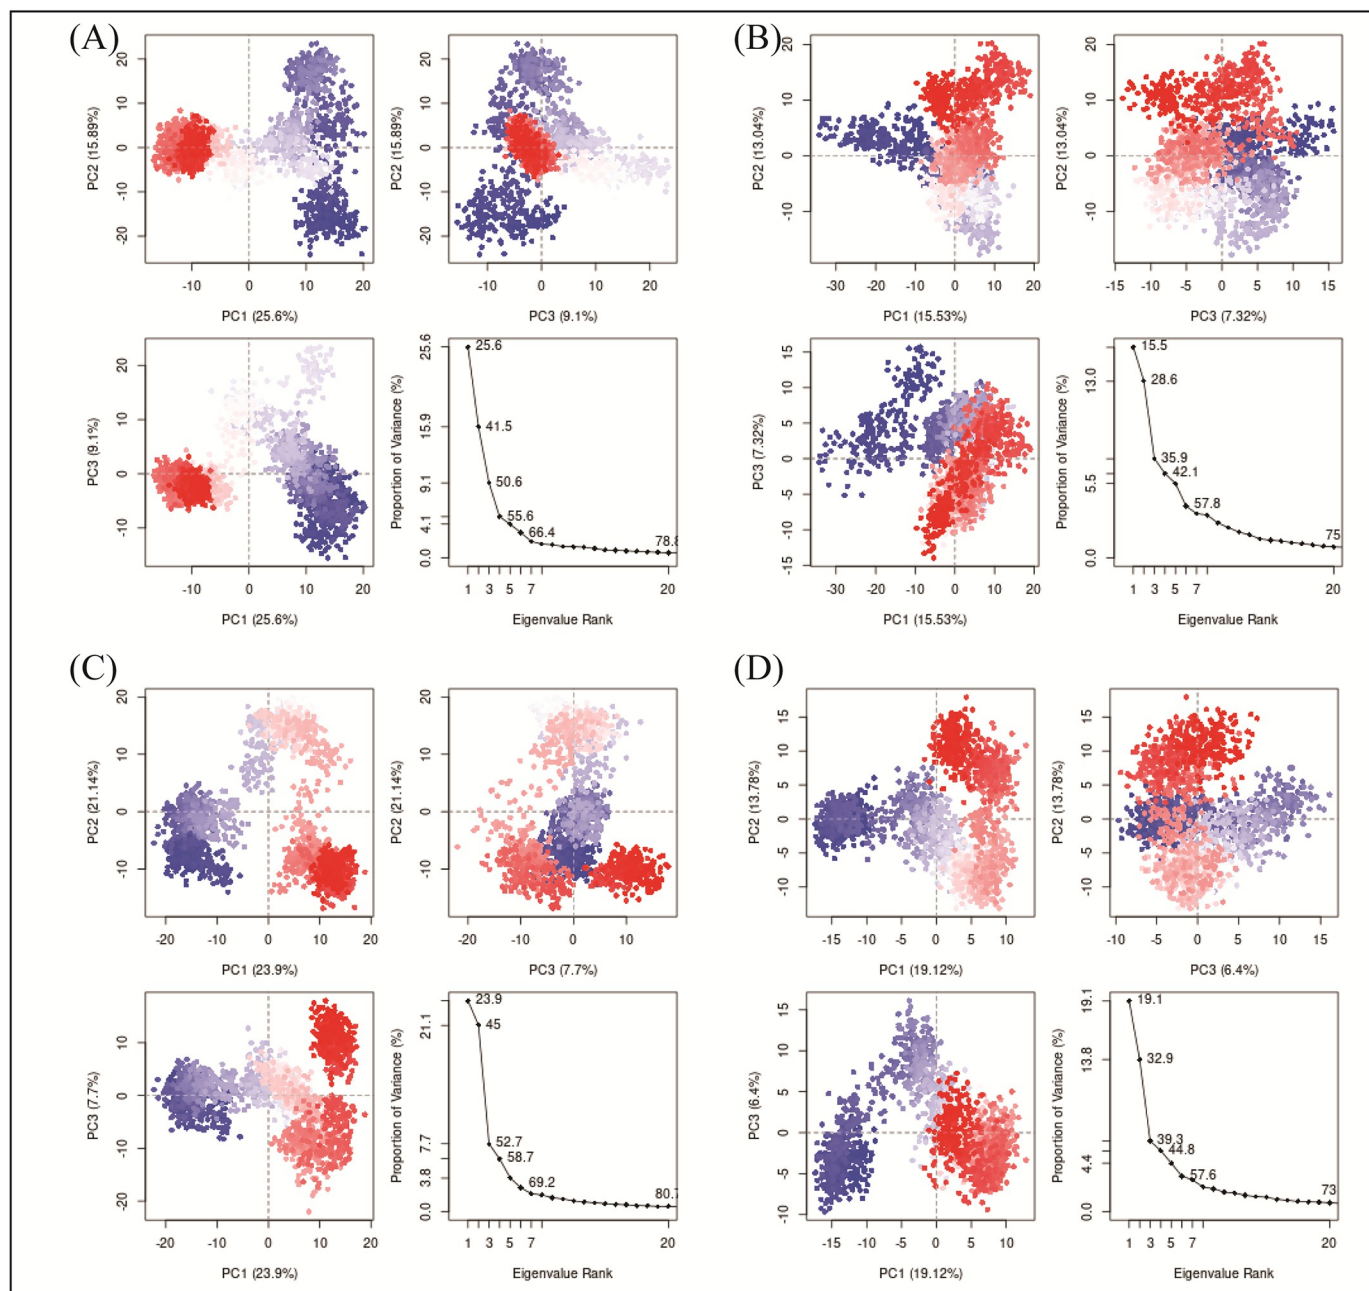

**Fig 9. Principal component analysis of the selected complexes.** (A) D356-2630 (B) C700-2058 (C) G842-0420 (D) F403-0203.

<https://doi.org/10.1371/journal.pone.0305934.g009>

the highest fluctuation observed in PC1 19.1% (Fig 9D). The most significant movements are shown with blue regions, with intermediate motions shown by white color, while red color show the minor fluctuations [33]. Further, the PCA based 2D energy surface was also generated to calculate the configurations with stable thermodynamic values. The energy surface calculated the fluctuation direction of energy in two PCs (PC1 and PC2) for carbon alpha atoms. Most of the clusters were found in the local minima well (purple color) which indicated the stable transition of one configuration to another in all four complexes (Fig 10).

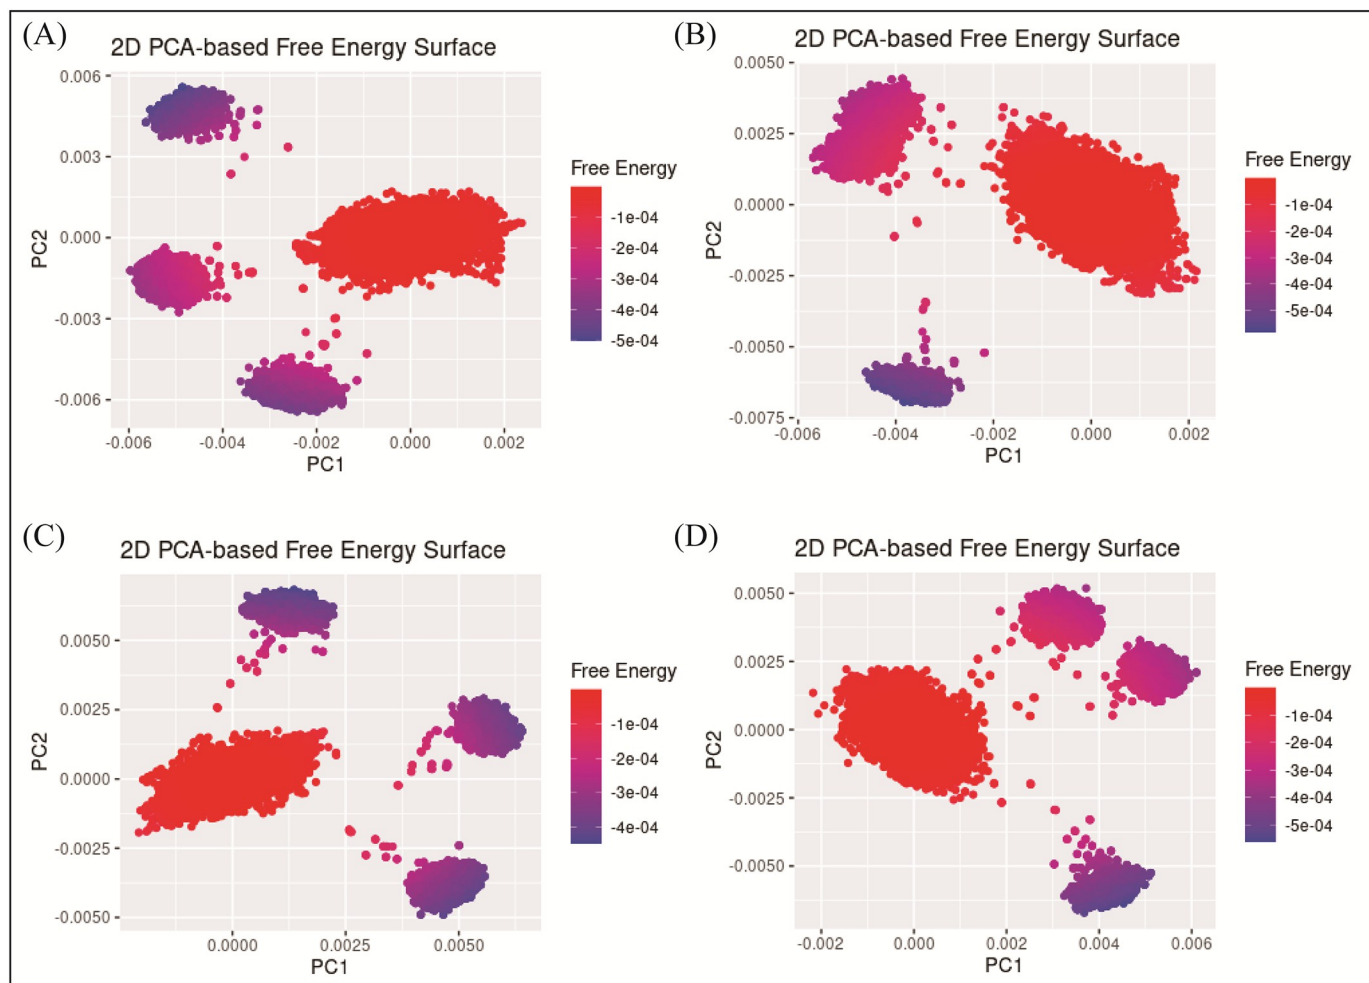

**Fig 10.** PCA based free energy surface of the complex calculated during simulation. (A) D356-2630 (B) C700-2058 (C) G842-0420 (D) F403-0203.

<https://doi.org/10.1371/journal.pone.0305934.g010>

**3.6.5. MM/GBSA.** The prime-MMGBSA module was used to calculate the binding energy of selected complexes [34]. The binding energies of the D356-2630, C700-2058, G842-0420 and F403-0203 complexes were -42.627, -59.33, -63.862, and -52.713 kcal/mol, respectively.  $G_{\text{bind}}$  resulted from non-bonded interactions,  $G_{\text{Coulomb}}$ ,  $G_{\text{Packing}}$ ,  $G_{\text{Hbond}}$ ,  $G_{\text{Lipo}}$ , and  $G_{\text{vdW}}$  (Fig 11).  $G_{\text{bindLipo}}$ ,  $G_{\text{bindvdW}}$ , and  $G_{\text{bindCoulomb}}$  affected the average binding free energies among all interaction types. Conversely, the final average binding energies were least affected by the  $G_{\text{bindSolvGB}}$  and  $G_{\text{bindCovalent}}$  energies. Furthermore, stable hydrogen bonds were observed between the ligands and amino acid residues indicated by  $G_{\text{bindHbond}}$  interaction values. Thus, the binding energies calculated during simulation supported the binding affinities of ligands obtained during docking studies [35].

## 4. Discussion

Psoriasis is a common chronic immune-mediated disease with numerous comorbidities that impair quality of life. Among psoriasis treatments, phosphodiesterase-4 (PDE4) inhibitors are emerging as new options. PDE4 inhibitors degrade cyclic adenosine monophosphate (cAMP), which contributes to the production of pro-inflammatory mediators [3]. Apremilast, an oral

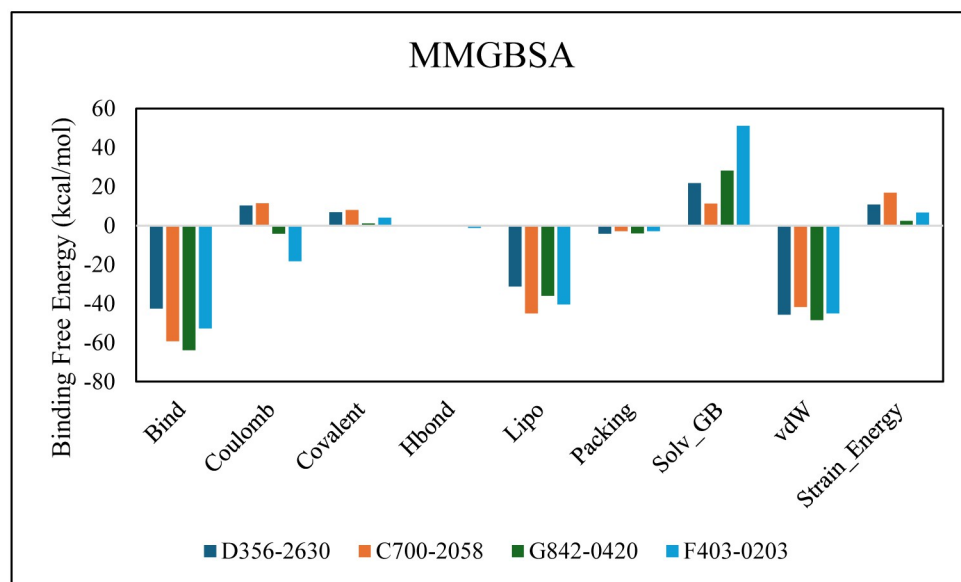

**Fig 11. The comparison of binding free energy components in selected complexes.**

<https://doi.org/10.1371/journal.pone.0305934.g011>

PDE4 inhibitor, is approved for treating psoriasis. While effective, its side effects may limit its utility [36]. Roflumilast, a topical PDE4 inhibitor, was recently approved for psoriasis and has shown promising results in clinical trials [37]. Crisaborole, a PDE4 inhibitor approved for atopic dermatitis, has also been evaluated in psoriasis. These PDE4 inhibitors pave the way for a promising future in psoriasis management [38]. The ongoing expansion of clinical trials, as well as continued research on existing agents and the development of novel inhibitors, have the potential to broaden psoriasis treatment options and improve outcomes [39,40].

In recent years, *in silico* approaches have transformed drug discovery by allowing the identification of novel PDE4 inhibitors with improved efficacy and safety profiles. These *in silico* techniques direct the design and synthesis of novel compounds with enhanced pharmacological properties while enabling the quick and economical exploration of chemical space [41,42]. Several studies have shown that *in silico* approaches can be effective in identifying novel PDE4 inhibitors for psoriasis treatment [43,44]. Hence, this study used molecular docking and virtual screening to identify a group of compounds with a high affinity for PDE4.

The PDE4 crystal structure coordinates (PDB ID: 7W4X) were obtained from the Protein Data Bank. The binding pocket residues were predicted and then chosen to generate the pharmacophore hypothesis, which consisted of seven features (R1981, A456, H1525, D953, D1041, D963, and R2081). By developing a pharmacophore model for PDE4 inhibitors, large chemical libraries can be screened for compounds that share these characteristics. This approach aids in the discovery of structurally diverse compounds that may inhibit PDE4 [45–47].

The CNS library of the ChemDiv database was virtually screened using the created pharmacophore model. A compound was considered a hit during screening if it matched at least four features. Virtual screening is the computational screening of large chemical libraries to find potential drug candidates [48–50]. Forty-six potential hits were identified by using a phase screen cutoff score of 1.5.

The hits generated during virtual screening were prepared and docked to the PDE4 receptor using glide's SP docking module. The docking poses were assessed using the glide gscore and molecular interactions of the docked compounds. Ten compounds with binding affinities

higher than -7 kcal/mol were chosen for further investigation. After analyzing the binding modes of the docked ligands, it was found that each of the ten ligands that were chosen occupied the same area in the protein's predicted binding pocket [51,52].

The bioactivity scores of the selected ten compounds were predicted. Since bioactivity scores are quantitative indicators of the interaction between putative drug candidates and their biological targets, they are extremely important in the drug discovery process. These rankings aid in the prioritization of compounds for additional research and development according to their anticipated or experimentally verified potency, specificity, and efficacy [53–55]. Certain compounds exhibited near-zero scores, signifying strong binding to the receptors. The results of the analysis showed that the chosen compounds possessed lead compound characteristics.

Further, ADMET characteristics of the selected compounds were analyzed. ADMET is an important set of criteria in the drug discovery and development process. Understanding and optimizing these properties is critical for determining whether a potential drug candidate is both effective and safe for human use [56–59]. Four compounds, D356-2630, C700-2058, G842-0420, and F403-0203, showed better QPPCaco values, so they were selected for further stability analysis.

Selected four compounds were subjected to stability analysis by performing 100ns simulation. These simulations shed light on the dynamics of molecular interactions, structural stability, and time-dependent conformational changes—all essential for comprehending how drugs interact with their intended targets [60–63]. All results show that the protein and ligand complexes remained stable during MD simulation, which offers valuable information about their dynamic behavior and makes them suitable for more research. Binding energies (MMGBSA) of the compounds were also calculated. According to MMGBSA analyses and MD simulations, these compounds were stable as effective inhibitors within the binding pocket of protein. The findings of this study may pave the way for the development of new anti-psoriasis drugs with improved efficacy and safety profiles.

However, computational research has some limitations. These methods rely on the accuracy of the models and algorithms used, which may fail to capture complex biological interactions. Furthermore, the availability and reliability of structural data limit the accuracy of predictions. Computational findings must also be rigorously validated *in vivo* to ensure efficacy, bioavailability, and safety [64,65]. Despite these limitations, combining CADD approaches with experimental validation shows great promise for developing effective and targeted psoriasis treatments.

## 5. Conclusion

The use of *in silico* techniques in this study successfully identified novel PDE4 inhibitors with promising therapeutic potential for psoriasis. The identified inhibitors had high binding affinities and favorable interactions with the PDE4 enzyme, indicating potential efficacy in modulating inflammatory pathways involved in psoriasis. These findings pave the way for additional experimental validation and optimization, eventually leading to the development of effective treatments for this chronic and debilitating skin condition. The study promotes the continued use of computational tools in drug discovery to address unmet medical needs and improve patient outcomes.

## Acknowledgments

Authors extend their appreciation to researchers supporting project Number (RSPD2024R885) at King Saud University Riyadh Saudi Arabia for supporting this research.

## Author Contributions

**Conceptualization:** Abdullah R. Alanzi.

**Data curation:** Mohammed S. Alsalhi, Moneerah J. Alqahtani.

**Formal analysis:** Ramzi A. Mothana, Moneerah J. Alqahtani.

**Investigation:** Ramzi A. Mothana, Jawaher H. Alqahtani.

**Methodology:** Mohammed S. Alsalhi, Ramzi A. Mothana.

**Software:** Jawaher H. Alqahtani, Moneerah J. Alqahtani.

**Supervision:** Abdullah R. Alanzi.

**Validation:** Abdullah R. Alanzi, Jawaher H. Alqahtani.

**Visualization:** Jawaher H. Alqahtani.

**Writing – original draft:** Mohammed S. Alsalhi.

**Writing – review & editing:** Abdullah R. Alanzi, Moneerah J. Alqahtani.

## References

1. Lowes MA, Suarez-Farinas M, Krueger JG. Immunology of psoriasis. Annual review of immunology. 2014; 32:227–55. <https://doi.org/10.1146/annurev-immunol-032713-120225> PMID: 24655295
2. Raharja A, Mahil SK, Barker JN. Psoriasis: a brief overview. Clinical Medicine. 2021; 21(3):170. <https://doi.org/10.7861/clinmed.2021-0257> PMID: 34001566
3. Crowley EL, Gooderham MJ. Phosphodiesterase-4 Inhibition in the Management of Psoriasis. Pharmaceutics. 2023; 16(1):23. <https://doi.org/10.3390/pharmaceutics16010023> PMID: 38258034
4. Milakovic M, Gooderham MJ. Phosphodiesterase-4 inhibition in psoriasis. Psoriasis: Targets and Therapy. 2021;21–9. <https://doi.org/10.2147/PTT.S303634> PMID: 33763335
5. Wittmann M, Helliwell PS. Phosphodiesterase 4 inhibition in the treatment of psoriasis, psoriatic arthritis and other chronic inflammatory diseases. Dermatology and therapy. 2013; 3:1–15. <https://doi.org/10.1007/s13555-013-0023-0> PMID: 23888251
6. Armstrong AW, Read C. Pathophysiology, clinical presentation, and treatment of psoriasis: a review. Jama. 2020; 323(19):1945–60. <https://doi.org/10.1001/jama.2020.4006> PMID: 32427307
7. Rendon A, Schäkel K. Psoriasis pathogenesis and treatment. International journal of molecular sciences. 2019; 20(6):1475. <https://doi.org/10.3390/ijms20061475> PMID: 30909615
8. Yazdani N, Mozafarpour S, Goodarzi A. Phosphodiesterase inhibitors and prostaglandin analogues in dermatology: A comprehensive review. Dermatologic Therapy. 2021; 34(1):e14669. <https://doi.org/10.1111/dth.14669> PMID: 33314552
9. Reid C, Griffiths CE. Psoriasis and treatment: past, present and future aspects. Acta dermato-venereologica. 2020; 100(3):69–79. <https://doi.org/10.2340/00015555-3386> PMID: 31971601
10. Zebda R, Paller AS. Phosphodiesterase 4 inhibitors. Journal of the American Academy of Dermatology. 2018; 78(3):S43–S52. <https://doi.org/10.1016/j.jaad.2017.11.056> PMID: 29248522
11. Li H, Zuo J, Tang W. Phosphodiesterase-4 inhibitors for the treatment of inflammatory diseases. Frontiers in pharmacology. 2018; 9:409585. <https://doi.org/10.3389/fphar.2018.01048> PMID: 30386231
12. Gurney ME, D'amato EC, Burgin AB. Phosphodiesterase-4 (PDE4) molecular pharmacology and Alzheimer's disease. Neurotherapeutics. 2015; 12(1):49–56. <https://doi.org/10.1007/s13311-014-0309-7> PMID: 25371167
13. Deeks ED. Apremilast: a review in psoriasis and psoriatic arthritis. Drugs. 2015; 75:1393–403. <https://doi.org/10.1007/s40265-015-0439-1> PMID: 26220911
14. Gooderham M, Papp K. Apremilast in the treatment of psoriasis and psoriatic arthritis. Skin Therapy Lett. 2015; 20(5):1–6. PMID: 26382906
15. Shah A, Choudhary A, Jain M, Perumal S, Patel V, Parmar G, et al. Discovery of novel anticancer flavonoids as potential HDAC2 inhibitors: virtual screening approach based on molecular docking, DFT and molecular dynamics simulations studies. 3 Biotech. 2024; 14(3):1–20.



16. Zhou H, Wang C, Ye J, Chen H, Tao R. Design, virtual screening, molecular docking and molecular dynamics studies of novel urushiol derivatives as potential HDAC2 selective inhibitors. *Gene*. 2017; 637:63–71. <https://doi.org/10.1016/j.gene.2017.09.034> PMID: 28939339
17. Sureja DK, Shah AP, Gajjar ND, Jadeja SB, Bodiwala KB, Dhameliya TM. In-silico Computational Investigations of AntiViral Lignan Derivatives as Potent Inhibitors of SARS CoV-2. *ChemistrySelect*. 2022; 7(28):e202202069. <https://doi.org/10.1002/slct.202202069> PMID: 35942360
18. Dixon SL, Smondyrev AM, Knoll EH, Rao SN, Shaw DE, Friesner RA JJoc-amd. PHASE: a new engine for pharmacophore perception, 3D QSAR model development, and 3D database screening: 1. Methodology and preliminary results. 2006; 20:647–71.
19. Shelley JC, Cholleti A, Frye LL, Greenwood JR, Timlin MR, Uchimaya M JJoc-amd. Epik: a software program for pK<sub>a</sub> prediction and protonation state generation for drug-like molecules. 2007; 21:681–91. <https://doi.org/10.1007/s10822-007-9133-z> PMID: 17899391
20. Madhavi Sastry G, Adzhigirey M, Day T, Annabhimoju R, Sherman W JJoc-amd. Protein and ligand preparation: parameters, protocols, and influence on virtual screening enrichments. 2013; 27(3):221–34. <https://doi.org/10.1007/s10822-013-9644-8> PMID: 23579614
21. Sadeer NB, Llorent-Martínez EJ, Bene K, Mahomoodally MF, Mollica A, Sinan KI, et al. Chemical profiling, antioxidant, enzyme inhibitory and molecular modelling studies on the leaves and stem bark extracts of three African medicinal plants. 2019; 174:19–33.
22. Shivakumar D, Harder E, Damm W, Friesner RA, Sherman W JJoc, computation. Improving the prediction of absolute solvation free energies using the next generation OPLS force field. 2012; 8(8):2553–8. <https://doi.org/10.1021/ct300203w> PMID: 26592101
23. Matsuoka M, Kumar A, Muddassar M, Matsuyama A, Yoshida M, Zhang KYJJoCI, et al. Discovery of fungal denitrification inhibitors by targeting copper nitrite reductase from *Fusarium oxysporum*. 2017; 57(2):203–13. <https://doi.org/10.1021/acs.jcim.6b00649> PMID: 28117584
24. Khan T, Dixit S, Ahmad R, Raza S, Azad I, Joshi S, et al. Molecular docking, PASS analysis, bioactivity score prediction, synthesis, characterization and biological activity evaluation of a functionalized 2-butanone thiosemicarbazone ligand and its complexes. 2017; 10:91–104.
25. Agamah FE, Mazandu GK, Hassan R, Bope CD, Thomford NE, Ghansah A, et al. Computational/in silico methods in drug target and lead prediction. 2020; 21(5):1663–75.
26. Oduselu GO, Ajani OO, Ajamma YU, Brors B, Adebiyi E JB, insights b. Homology modelling and molecular docking studies of selected substituted benzo [d] imidazol-1-yl methyl benzimidamide scaffolds on *Plasmodium falciparum* adenylosuccinate lyase receptor. 2019; 13:1177932219865533. <https://doi.org/10.1177/1177932219865533> PMID: 31391779
27. Ejeh S, Uzairu A, Shallangwa GA, Abechi SE, Ibrahim MT JBotNRC. In silico design and pharmacokinetics investigation of some novel hepatitis C virus NS5B inhibitors: pharmacoinformatics approach. 2022; 46(1):1–11.
28. Bowers KJ, Chow E, Xu H, Dror RO, Eastwood MP, Gregersen BA, et al., editors. Scalable algorithms for molecular dynamics simulations on commodity clusters. *Proceedings of the 2006 ACM/IEEE Conference on Supercomputing*; 2006.
29. Price DJ, Brooks III CL JTJocp. A modified TIP3P water potential for simulation with Ewald summation. 2004; 121(20):10096–103. <https://doi.org/10.1063/1.1808117> PMID: 15549884
30. Prema V, Meena A, Ramalakshmi NJCc-add. In-silico Design, ADMET Screening, Prime MM-GBSA Binding Free Energy Calculation and MD Simulation of Some Novel Phenothiazines as 5HT<sub>6</sub>R Antagonists Targeting Alzheimer's Disease.
31. Sargsyan K, Grauffel C, Lim C JJoc, computation. How molecular size impacts RMSD applications in molecular dynamics simulations. 2017; 13(4):1518–24. <https://doi.org/10.1021/acs.jctc.7b00028> PMID: 28267328
32. Martínez L JPo. Automatic identification of mobile and rigid substructures in molecular dynamics simulations and fractional structural fluctuation analysis. 2015; 10(3):e0119264.
33. Khan SS, Shen Y, Fatmi MQ, Campbell RE, Bokhari HJB. Design and Prototyping of Genetically Encoded Arsenic Biosensors Based on Transcriptional Regulator AfArsR. 2021; 11(9):1276.
34. Godschalk F, Genheden S, Söderhjelm P, Ryde U JPCCP. Comparison of MM/GBSA calculations based on explicit and implicit solvent simulations. 2013; 15(20):7731–9. <https://doi.org/10.1039/c3cp00116d> PMID: 23595060
35. Decherchi S, Cavalli A JCR. Thermodynamics and kinetics of drug-target binding by molecular simulation. 2020; 120(23):12788–833. <https://doi.org/10.1021/acs.chemrev.0c00534> PMID: 33006893
36. Paul C, Cather J, Gooderham M, Poulin Y, Mrowietz U, Ferrandiz C, et al. Efficacy and safety of apremilast, an oral phosphodiesterase 4 inhibitor, in patients with moderate-to-severe plaque psoriasis over 52



- weeks: a phase III, randomized controlled trial (ESTEEM 2). *British Journal of Dermatology*. 2015; 173(6):1387–99.
37. Papp KA, Gooderham M, Droege M, Merritt C, Osborne DW, Berk DR, et al. Roflumilast cream improves signs and symptoms of plaque psoriasis: results from a phase 1/2a randomized, controlled study. *Journal of Drugs in Dermatology: JDD*. 2020; 19(8):734–40.
  38. Hashim PW, Chima M, Kim HJ, Bares J, Yao CJ, Singer G, et al. Crisaborole 2% ointment for the treatment of intertriginous, anogenital, and facial psoriasis: a double-blind, randomized, vehicle-controlled trial. *Journal of the American Academy of Dermatology*. 2020; 82(2):360–5. <https://doi.org/10.1016/j.jaad.2019.06.1288> PMID: 31279028
  39. Padda IS, Tripp J. Phosphodiesterase inhibitors. 2020.
  40. Liu Z, Liu M, Cao Z, Qiu P, Song G. Phosphodiesterase-4 inhibitors: a review of current developments (2013–2021). *Expert Opinion on Therapeutic Patents*. 2022; 32(3):261–78.
  41. Shaker B, Ahmad S, Lee J, Jung C, Na D. In silico methods and tools for drug discovery. *Computers in biology and medicine*. 2021; 137:104851. <https://doi.org/10.1016/j.combiomed.2021.104851> PMID: 34520990
  42. Hodos RA, Kidd BA, Shameer K, Readhead BP, Dudley JT. In silico methods for drug repurposing and pharmacology. *Wiley Interdisciplinary Reviews: Systems Biology and Medicine*. 2016; 8(3):186–210. <https://doi.org/10.1002/wsbm.1337> PMID: 27080087
  43. Manakadan A, Sathianarayanan S, Namboori PK, Saranya T. In-Silico Analysis and Molecular Docking Studies of Potential Phosphodiesterase 4 Inhibitors using Ventilago Isolates. *Letters in Organic Chemistry*. 2018; 15(9):731–8.
  44. Sunitha Sukumaran MM, Sneha S, Arjun B, Sathianarayanan S, Saranya T. Insilico analysis of acridone against TNF- $\alpha$  and PDE4 targets for the treatment of psoriasis. 2020.
  45. Khedkar SA, Malde AK, Coutinho EC, Srivastava S. Pharmacophore modeling in drug discovery and development: an overview. *Medicinal Chemistry*. 2007; 3(2):187–97. <https://doi.org/10.2174/157340607780059521> PMID: 17348856
  46. Muhammed MT, Aki-yalcin E. Pharmacophore modeling in drug discovery: methodology and current status. *Journal of the Turkish Chemical Society Section A: Chemistry*. 2021; 8(3):749–62.
  47. MA Kawsar S, Hosen MA, Ahmad S, El Bakri Y, Laaroussi H, Ben Hadda T, et al. Potential SARS-CoV-2 RdRp inhibitors of cytidine derivatives: Molecular docking, molecular dynamic simulations, ADMET, and POM analyses for the identification of pharmacophore sites. 2022; 17(11):e0273256.
  48. Patel AR, Patel HB, Mody SK, Singh RD, Sarvaiya VN, Vaghela SH, et al. Virtual screening in drug discovery. *Journal Of Veterinary Pharmacology And Toxicology*. 2021; 20(2):1–9.
  49. Walters WP, Wang R. New trends in virtual screening. ACS Publications; 2020. p. 4109–11.
  50. Hosen MA, Munia NS, Al-Ghorbani M, Baashen M, Almalki FA, Hadda TB, et al. Synthesis, antimicrobial, molecular docking and molecular dynamics studies of lauroyl thymidine analogs against SARS-CoV-2: POM study and identification of the pharmacophore sites. 2022; 125:105850.
  51. Amin MR, Yasmin F, Hosen MA, Dey S, Mahmud S, Saleh MA, et al. Synthesis, antimicrobial, anticancer, PASS, molecular docking, molecular dynamic simulations & pharmacokinetic predictions of some methyl  $\beta$ -D-galactopyranoside analogs. 2021; 26(22):7016.
  52. Kawsar SMA, Hosen MA, Chowdhury TS, Rana KM, Fujii Y, Ozeki Y JRdC. Thermochemical, PASS, molecular docking, drug-likeness and in silico ADMET prediction of cytidine derivatives against HIV-1 reverse transcriptase. 2021; 72(3):159–78.
  53. Lane TR, Foil DH, Minerali E, Urbina F, Zorn KM, Ekins S. Bioactivity comparison across multiple machine learning algorithms using over 5000 datasets for drug discovery. *Molecular pharmaceutics*. 2020; 18(1):403–15. <https://doi.org/10.1021/acs.molpharmaceut.0c01013> PMID: 33325717
  54. Periwal V, Bassler S, Andrejev S, Gabrielli N, Patil KR, Typas A, et al. Bioactivity assessment of natural compounds using machine learning models trained on target similarity between drugs. *PLoS computational biology*. 2022; 18(4):e1010029. <https://doi.org/10.1371/journal.pcbi.1010029> PMID: 35468126
  55. Kawsar SM, Hossain MA JTC, Chemistry T. An optimization and pharmacokinetic studies of some thymidine derivatives. 2020; 4(2):59–66.
  56. Ferreira LL, Andricopulo AD. ADMET modeling approaches in drug discovery. *Drug discovery today*. 2019; 24(5):1157–65. <https://doi.org/10.1016/j.drudis.2019.03.015> PMID: 30890362
  57. Patil PS. Drug discovery and ADMET process: a review. *Int J Adv Res Biol Sci*. 2016; 3(7):181–92.
  58. Parmar G, Shah A, Shah S, Seth AK JBRAC. Identification of bioactive phytoconstituents from the plant *Euphorbia hirta* as potential inhibitor of SARS-CoV-2: an in-silico approach. 2022; 12:1385–96.
  59. Shah AP, Parmar BM, Ghodawala MA, Seth A JJolHS. In silico drug discovery of novel small lead compounds targeting nipah virus attachment glycoprotein. 2018; 6(2):60–3.

60. Salo-Ahen OM, Alanko I, Bhadane R, Bonvin AM, Honorato RV, Hossain S, et al. Molecular dynamics simulations in drug discovery and pharmaceutical development. *Processes*. 2020; 9(1):71.
61. Adelusi TI, Oyedele A-QK, Boyenle ID, Ogunlana AT, Adeyemi RO, Ukachi CD, et al. Molecular modeling in drug discovery. *Informatics in Medicine Unlocked*. 2022; 29:100880.
62. Amin MR, Yasmin F, Dey S, Mahmud S, Saleh MA, Emran TB, et al. Methyl  $\beta$ -D-galactopyranoside esters as potential inhibitors for SARS-CoV-2 protease enzyme: synthesis, antimicrobial, PASS, molecular docking, molecular dynamics simulations and quantum computations. 2021:1–30.
63. Munia NS, Alanazi MM, El Bakri Y, Alanazi AS, Mukhrish YE, Hasan I, et al. Uridine Derivatives: Synthesis, Biological Evaluation, and In Silico Studies as Antimicrobial and Anticancer Agents. 2023; 59(6):1107.
64. Shah A, Jain M. Limitations and future challenges of computer-aided drug design methods. *Computer aided drug design (CADD): From ligand-based methods to structure-based approaches*: Elsevier; 2022. p. 283–97.
65. Zhao L, Ciallella HL, Aleksunes LM, Zhu H. Advancing computer-aided drug discovery (CADD) by big data and data-driven machine learning modeling. *Drug discovery today*. 2020; 25(9):1624–38. <https://doi.org/10.1016/j.drudis.2020.07.005> PMID: 32663517
